# Supplementary material for: Evaluation of the Nutritional Quality of Chinese Processed Meat Products: Comparison of Two Nutrient Profile Models
Source: MDPI journal article supplement (doi:10.3390/nu16050578), 2024-02-20
Supplement: s1 [file s1]

## Supplementary Materials:

Table S1. Classification and examples of main processed meat products in China.

| Food category                         | Examples of Food Items                                                                                                                                                                       | Type of standards                                     | Standard                                                                                                                                                                                                                                                                                                    |
|---------------------------------------|----------------------------------------------------------------------------------------------------------------------------------------------------------------------------------------------|-------------------------------------------------------|-------------------------------------------------------------------------------------------------------------------------------------------------------------------------------------------------------------------------------------------------------------------------------------------------------------|
| Cured meat products                   | Sausage of Guang flavor, Pickled meat in salt, etc                                                                                                                                           | national standards, health standards                  | The Standard on Nutrition Labelling of Prepackaged Foods (GB 28050-2011), The Standards for Uses of Food Additive (GB 2760-2014), Regulation of Food Composition Data Expression (WS/T 464-2015), Cured Meat Products (GB 2730-2015)                                                                        |
| Prepared meat products                | Popcorn chicken, Beef steak, Mutton kebabs, Beef kebabs, Chicken nugget, Chicken steak, Chicken pieces, etc                                                                                  | national standards, health standards, group standards | The Standard on Nutrition Labelling of Prepackaged Foods (GB 28050-2011), The Standards for Uses of Food Additive (GB 2760-2014), Regulation of Food Composition Data Expression (WS/T 464-2015), Prefabricated Seasoned Meat Products (T/FJSP 0006-2020)                                                   |
| Soy sauce and pot-roast meat products | Meat in sauce, Plain boiled pork, Pork ear in sauce, Pork feet in sauce, Chicken feet in sauce, Chicken wings in sauce, Chicken drumsticks in sauce, Duck wings in sauce, Beef in sauce, etc | national standards, health standards,                 | The Standard on Nutrition Labelling of Prepackaged Foods (GB 28050-2011), The Standards for Uses of Food Additive (GB 2760-2014), Regulation of Food Composition Data Expression (WS/T 464-2015), Soy Sauce and Pot-roast Meat Products (GB/T 23586-2009)                                                   |
| Dried meat products                   | dried meat floss, dried meat dice, dried meat slice, etc                                                                                                                                     | national standards, health standards                  | The Standard on Nutrition Labelling of Prepackaged Foods (GB 28050-2011), The Standards for Uses of Food Additive (GB 2760-2014), Regulation of Food Composition Data Expression (WS/T 464-2015), Dried Meat Floss (GB/T 23968-2009), Dried Meat Dice (GB/T 23969-2009), Dried Meat Slice (GB/T 31406-2015) |
| Smoked and roasted meat products      | Peking Roasted Duck, Chinese bacon, Bacon, Roasted chicken wings, Roasted Chicken drumsticks,                                                                                                | national standards, health standards                  | The Standard on Nutrition Labelling of Prepackaged Foods (GB 28050-2011), The Standards for Uses of Food Additive (GB 2760-2014), Regulation of Food Composition Data Expression                                                                                                                            |

|                            |                                                           |                                                                      |                                                                                                                                                                                                                                                                                                                                                                                                  |
|----------------------------|-----------------------------------------------------------|----------------------------------------------------------------------|--------------------------------------------------------------------------------------------------------------------------------------------------------------------------------------------------------------------------------------------------------------------------------------------------------------------------------------------------------------------------------------------------|
|                            | Roasted Chicken neck,<br>Roasted beef, etc                |                                                                      | (WS/T 464-2015), Bacon (GB/T<br>23492-2009)                                                                                                                                                                                                                                                                                                                                                      |
|                            |                                                           |                                                                      | The Standard on Nutrition Labelling of<br>Prepackaged Foods (GB 28050-2011),<br>The Standards for Uses of Food<br>Additive (GB 2760-2014), Regulation<br>of Food Composition Data Expression<br>(WS/T 464-2015), Canned Stewed Beef<br>(QB/T 1363-1991), Canned Steamed<br>Beef (GB/T 13514-1992), Canned Pork<br>in Natural Juice (GB/T 13513-1992),<br>Canned Steamed Pork (QB/T<br>2786-2006) |
| Canned<br>meat<br>products | Canned pork, Canned<br>beef, Canned luncheon<br>meat, etc | national<br>standards, health<br>standards,<br>industry<br>standards |                                                                                                                                                                                                                                                                                                                                                                                                  |
| Sausage<br>products        | Jinhua ham, Xuanwei<br>ham, Cooked crued<br>ham           | national<br>standards, health<br>standards                           | The Standard on Nutrition Labelling of<br>Prepackaged Foods (GB 28050-2011),<br>The Standards for Uses of Food<br>Additive (GB 2760-2014), Regulation<br>of Food Composition Data Expression<br>(WS/T 464-2015), Cooked Crued Ham<br>(GB/T 20711-2006), Ham Sausage<br>(GB/T 20712-2006)                                                                                                         |

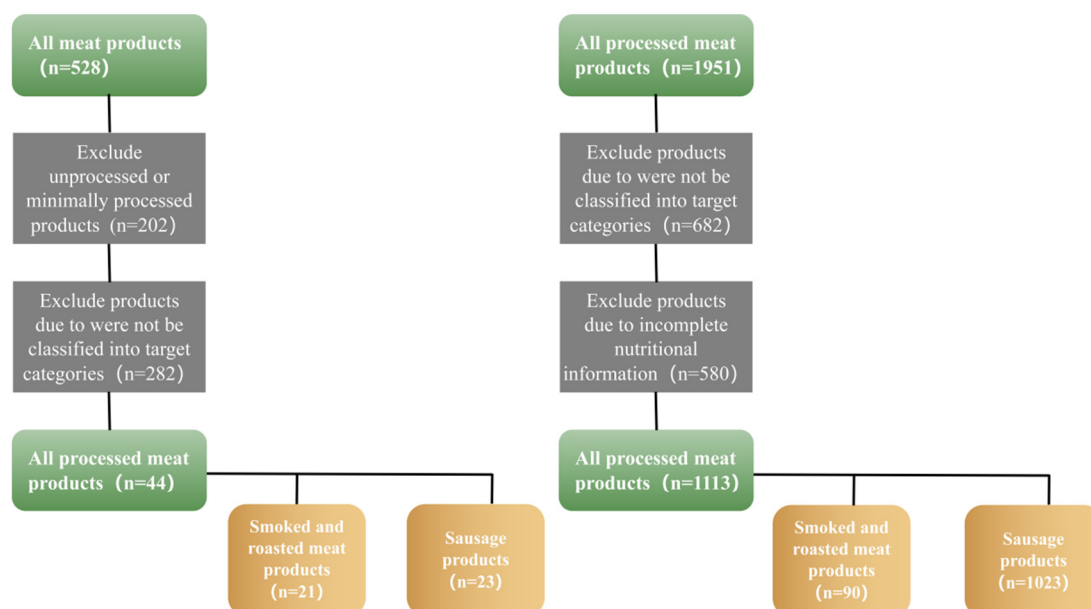

Figure S1. Selection process of processed meat products in the UK and France.

Table S2. Number and proportion of processed meat products meeting the criteria of the Chilean FOPWL.

| Food category                                 | Meets Criteria for Chilean FOPWL |      |               |      |             |       |        |      |
|-----------------------------------------------|----------------------------------|------|---------------|------|-------------|-------|--------|------|
|                                               | Energy                           |      | Saturated fat |      | Total sugar |       | Sodium |      |
|                                               | n                                | %    | n             | %    | n           | %     | n      | %    |
| Chinese cured meat products                   | 2                                | 4.9  | -*            | -    | -           | -     | 0      | 0.0  |
| Chinese prepared meat products                | 53                               | 98.1 | -             | -    | -           | -     | 9      | 16.7 |
| Chinese soy sauce and pot-roast meat products | 781                              | 79.4 | -             | -    | -           | -     | 21     | 2.1  |
| Chinese dried meat products                   | 24                               | 5.3  | -             | -    | -           | -     | 2      | 0.4  |
| Chinese smoked and roasted meat products      | 67                               | 72.0 | -             | -    | -           | -     | 1      | 1.1  |
| Chinese canned meat products                  | 36                               | 58.1 | -             | -    | -           | -     | 0      | 0.0  |
| Chinese sausage products                      | 169                              | 86.7 | -             | -    | -           | -     | 0      | 0.0  |
| Smoked and roasted meat products in the UK    | 8                                | 38.1 | 2             | 9.5  | 21          | 100.0 | 0      | 0.0  |
| Sausage products in the UK                    | 14                               | 60.9 | 7             | 30.4 | 23          | 100.0 | 1      | 4.3  |
| French smoked and roasted meat products       | 71                               | 78.9 | 6             | 6.7  | 90          | 100.0 | 0      | 0.0  |
| French sausage products                       | 658                              | 64.3 | 468           | 45.7 | 1022        | 99.9  | 1      | 0.1  |

Notes: \* The Standard on Nutrition Labelling of Pre-packaged Foods (GB 28050-2011) specifies mandatory rules for nutrition labeling by manufacturers to provide quantitative information on energy, protein, fat, carbohydrate, and sodium content of foods and their contributions to NRV. Thus, we derived the the total sugar content and saturated fat content of processed meat products from *China Food Composition Tables Standard Edition* and literature .Therefore, this study did not evaluate the number and proportion of sugar and saturated fat in Chinese processed meat products that met the criteria of the Chilean FOPWL.

Table S3. Number and proportion of processed meat products meeting the criteria of Chinese healthier choice logo.

| Food category                                 | Meets Criteria for Chinese healthier choice logo |      |               |      |             |       |        |      |
|-----------------------------------------------|--------------------------------------------------|------|---------------|------|-------------|-------|--------|------|
|                                               | Total fat                                        |      | Saturated fat |      | Total sugar |       | Sodium |      |
|                                               | n                                                | %    | n             | %    | n           | %     | n      | %    |
| Chinese cured meat products                   | 2                                                | 4.9  | -*            | -    | -           | -     | 2      | 4.9  |
| Chinese prepared meat products                | 34                                               | 63.0 | -             | -    | -           | -     | 42     | 77.8 |
| Chinese soy sauce and pot-roast meat products | 592                                              | 60.2 | -             | -    | -           | -     | 126    | 12.8 |
| Chinese dried meat products                   | 316                                              | 69.1 | -             | -    | -           | -     | 29     | 6.3  |
| Chinese smoked and roasted meat products      | 44                                               | 47.3 | -             | -    | -           | -     | 13     | 14.0 |
| Chinese canned meat products                  | 11                                               | 17.7 | -             | -    | -           | -     | 31     | 50.0 |
| Chinese sausage products                      | 75                                               | 38.5 | -             | -    | -           | -     | 39     | 20.0 |
| Smoked and roasted meat products in the UK    | 2                                                | 9.5  | NA            | NA   | 23          | 100.0 | 2      | 9.5  |
| Sausage products in the UK                    | 7                                                | 30.4 | 8             | 34.8 | 23          | 100.0 | 17     | 73.9 |
| French smoked and roasted meat products       | 3                                                | 3.3  | NA            | NA   | 90          | 100.0 | 4      | 4.4  |
| French sausage products                       | 461                                              | 45.1 | 520           | 50.8 | 1020        | 99.7  | 324    | 31.7 |

Notes: \*The Standard on Nutrition Labelling of Pre-packaged Foods (GB 28050-2011) specifies mandatory rules for nutrition labeling by manufacturers to provide quantitative information on energy, protein, fat, carbohydrate, and sodium content of foods and their contributions to NRV. Thus, we derived the the total sugar content and saturated fat content of processed meat products from *China Food Composition Tables Standard Edition* and literature .Therefore, this study did not evaluate the number and proportion of sugar and saturated fat in Chinese processed meat products that met the criteria of the Chinese Healthier Choice logo.
